# Supplementary material for: Cholangiocyte senescence in primary sclerosing cholangitis is associated with disease severity and prognosis
Source: PubMed Central journal article supplement — JHEP Rep. 2021 Mar 30;3(3):100286. doi: 10.1016/j.jhepr.2021.100286 (PMC8141934; doi:10.1016/j.jhepr.2021.100286), 2021-03-30
Supplement: mmc1.pdf [file mmc1.pdf]

# **Cholangiocyte senescence in primary sclerosing cholangitis is associated with disease severity and prognosis**

Nora Cazzagon, Samantha Sarcognato, Annarosa Floreani, Giorgia Corrà, Sara De Martin, Vincenza Guzzardo, Francesco Paolo Russo, Maria Guido

## Table of contents

|              |   |
|--------------|---|
| Fig. S1..... | 2 |
| Fig. S2..... | 3 |
| Fig. S3..... | 4 |
| Fig. S4..... | 5 |

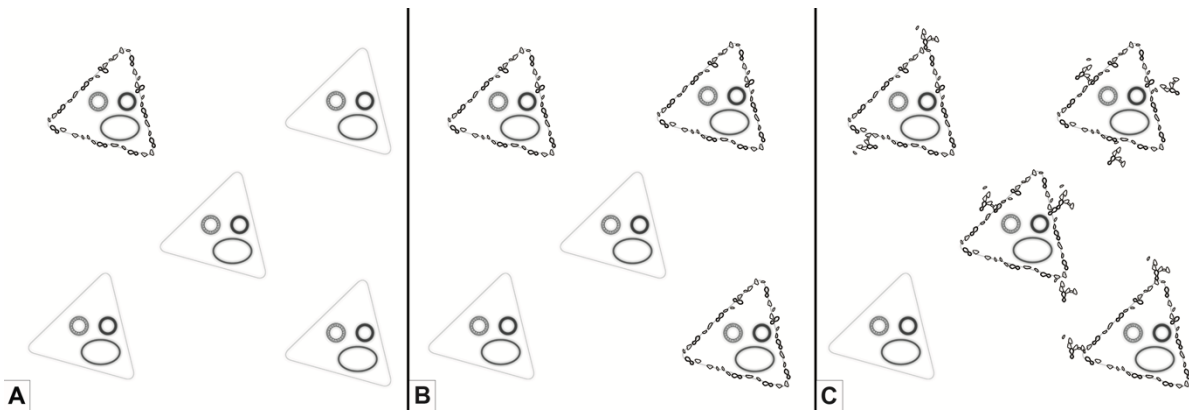

**Fig. S1. Schematic representation of DR extent.** In every case, DR extent was semi-quantitatively scored as negative (not represented), score 1: DR in <50% of PTs (**A**), score 2: DR in  $\geq$ 50% of PTs (**B**), score 3: DR in  $\geq$ 50% of PTs plus ductular buds into the acinar parenchyma (**C**).

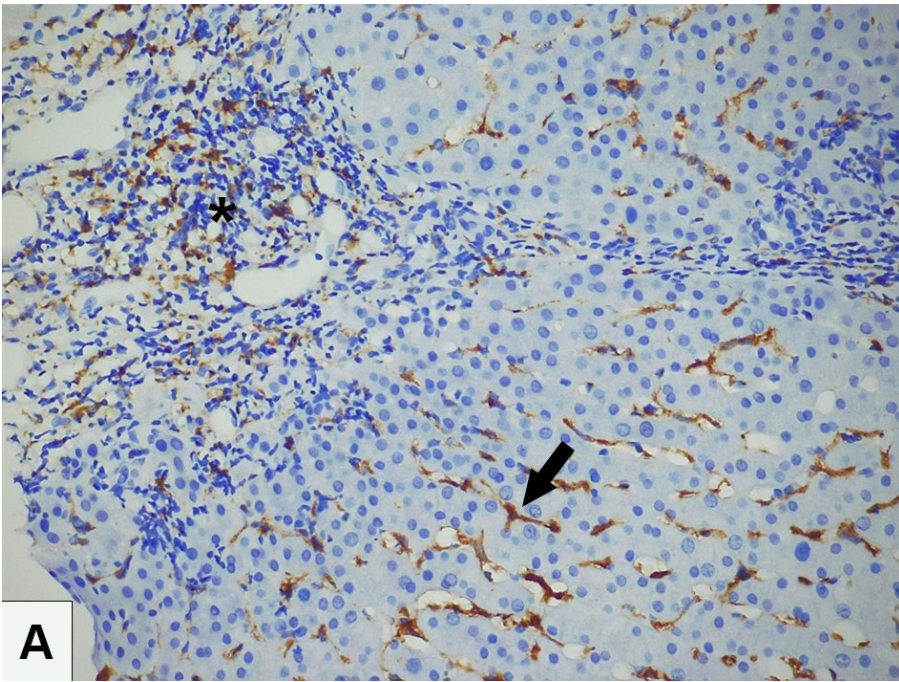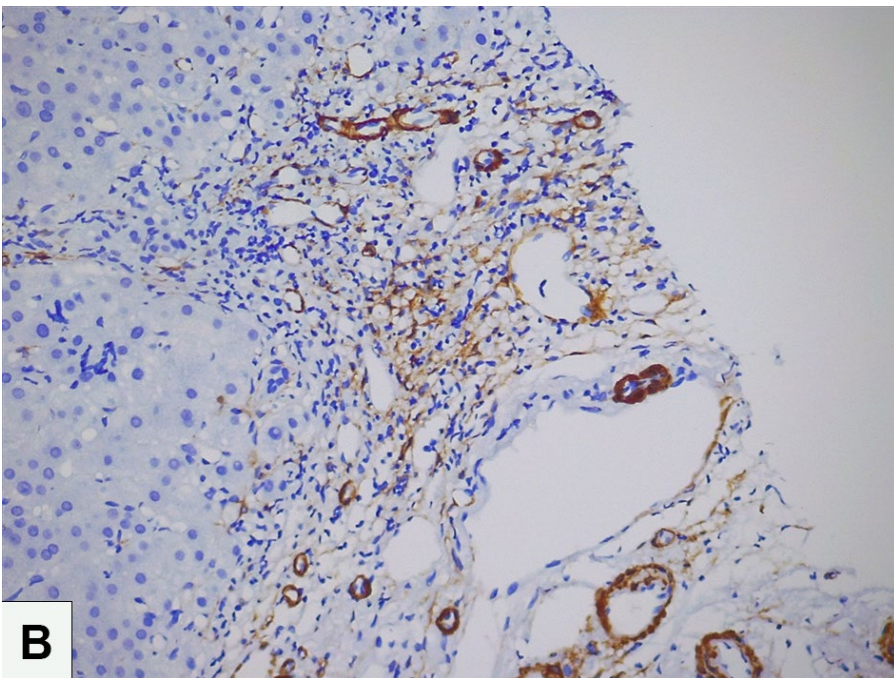

**Fig. S2. Immunohistochemical evaluation of macrophage and myofibroblast infiltration in PTs of PSC cases.** Examples of score 2 stains for the macrophage marker CD163 (**A**; original magnification 20x) and the myofibroblast marker SMA (**B**; original magnification 20x). In panel A, note the numerous portal macrophages (asterisk) and the adjacent internal positive control represented by Kupffer cells in the sinusoids (arrow).

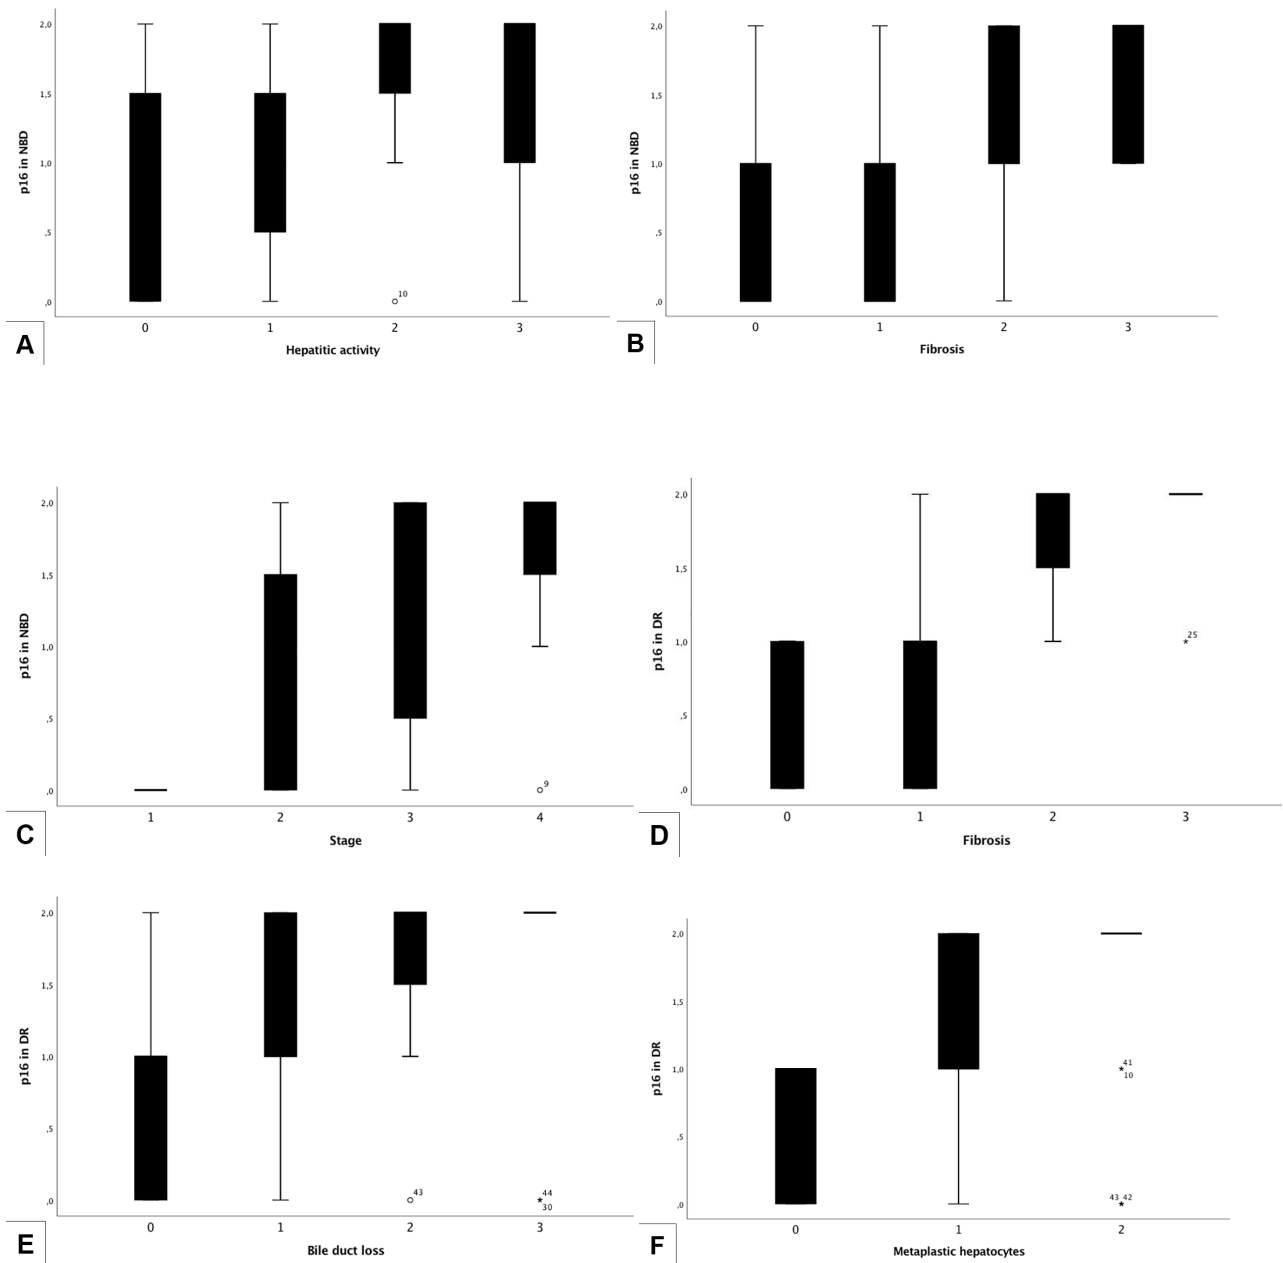

**Fig. S3. Box plots showing the most significant associations between p16 expression in NBD and DR and histological features.** Abbreviations: NBD, native bile duct; DR, ductular reaction.

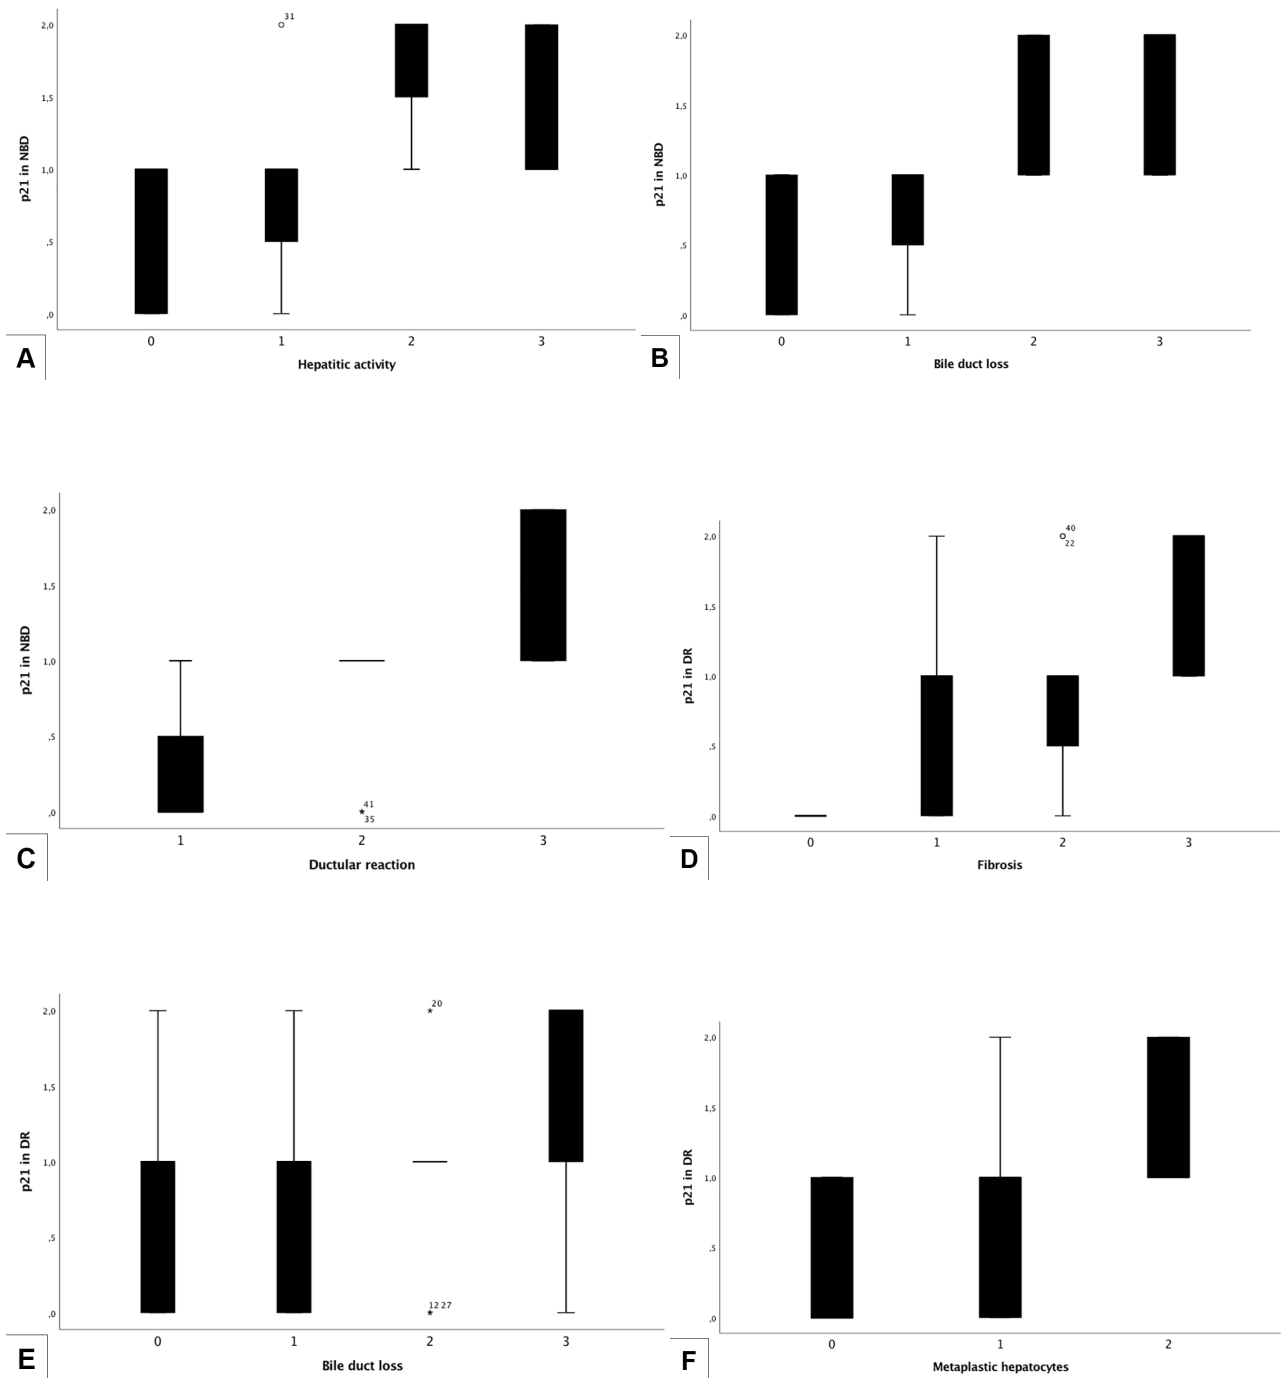

**Fig. S4. Box plots showing the most significant associations between p21 expression in NBD and DR and histological features.** Abbreviations: NBD, native bile duct; DR, ductular reaction.
