# Supplementary material for: Cholangiocyte senescence in primary sclerosing cholangitis is associated with disease severity and prognosis
Source: PubMed Central journal article supplement — JHEP Rep. 2021 Mar 30;3(3):100286. doi: 10.1016/j.jhepr.2021.100286 (PMC8141934; doi:10.1016/j.jhepr.2021.100286), 2021-03-30
Supplement: mmc2.pdf [file mmc2.pdf]

## JHEP Reports

### CTAT methods

Tables for a “Complete, Transparent, Accurate and Timely account” (CTAT) are now mandatory for all revised submissions. The aim is to enhance the reproducibility of methods.

- Only include the parts relevant to your study
- Refer to the CTAT in the main text as ‘Supplementary CTAT Table’
- Do not add subheadings
- Add as many rows as needed to include all information
- Only include one item per row

If the CTAT form is not relevant to your study, please outline the reasons why:

|  |
|--|
|  |
|--|

#### 1.1 Antibodies

| Name                    | Citation                                         | Supplier                                              | Cat no.             | Clone no.   |
|-------------------------|--------------------------------------------------|-------------------------------------------------------|---------------------|-------------|
| Anti - p16<br>INK4A     | Virchows Arch<br>2004;445:616-<br>20.            | Ventana<br>Medical System<br>Inc. Tucson,<br>AZ, UDCA | Mouse<br>monoclonal | E6H4        |
| Anti – p21<br>WAF1/Cyp1 | Am J Pathol<br>2001;158:1379-<br>90              | Dako, Glostrup,<br>Denmark                            | Mouse<br>monoclonal | SX118       |
| Anti-CK7                | Mod Pathol<br>2000;13:962-<br>72.                | Cell Marque,<br>Rocklin, CA,<br>USA                   | Mouse<br>monoclonal | OV-TL 12/30 |
| Anti-CD163              | Antioxid Redox<br>Signal<br>2013;18:2352-<br>63. | Cell Marque,<br>Rocklin, CA,<br>USA                   | Mouse<br>monoclonal | MRQ-26      |
| Anti-SMA                | Hum Pathol<br>1994;25:671-7                      | Dako, Glostrup,<br>Denmark                            | Mouse<br>monoclonal | 1A4         |

#### 1.2 Cell lines

| Name | Citation | Supplier | Cat no. | Passage<br>no. | Authentication<br>test method |
|------|----------|----------|---------|----------------|-------------------------------|
|      |          |          |         |                |                               |

#### 1.3 Organisms

| Name | Citation | Supplier | Strain | Sex | Age | Overall n<br>number |
|------|----------|----------|--------|-----|-----|---------------------|
|      |          |          |        |     |     |                     |

#### 1.4 Sequence based reagents

| Name | Sequence | Supplier |
|------|----------|----------|
|      |          |          |

|  |  |  |
|--|--|--|
|  |  |  |
|--|--|--|

## 1.5 Biological samples

| Description     | Source                                                  | Identifier                        |
|-----------------|---------------------------------------------------------|-----------------------------------|
| Liver specimens | Dept. of Pathology,<br>University Hospital of<br>Padova | Anonymous alpha-numerical<br>code |

## 1.6 Deposited data

| Name of repository | Identifier | Link |
|--------------------|------------|------|
|                    |            |      |

## 1.7 Software

| Software name                                 | Manufacturer                             | Version    |
|-----------------------------------------------|------------------------------------------|------------|
| Statistical Package for the<br>Social Science | IBM SPSS Statistics, Chicago, IL,<br>USA | version 25 |
| GraphPad                                      | GraphPad Software, San Diego,<br>CA, USA | version 6  |

## 1.8 Other (e.g. drugs, proteins, vectors etc.)

|  |  |  |
|--|--|--|
|  |  |  |
|  |  |  |

## 1.9 Please provide the details of the corresponding methods author for the manuscript:

|                                                                                                                                     |
|-------------------------------------------------------------------------------------------------------------------------------------|
| Samantha Sarcognato, Dept. of Pathology, Azienda ULSS2 Marca Trevigiana, Treviso, Italy email: samantha.sarcognato@aulss2.veneto.it |
|-------------------------------------------------------------------------------------------------------------------------------------|

## 2.0 Please confirm for randomised controlled trials all versions of the clinical protocol are included in the submission. These will be published online as supplementary information.

|  |
|--|
|  |
|--|
